# Supplementary material
Source: PubMed Central journal article supplement (PMC6957280)
Supplement: ehp-127-127004-s002.pdf [file ehp-127-127004-s002.pdf]

**Note to readers with disabilities:** *EHP* strives to ensure that all journal content is accessible to all readers. However, some figures and Supplemental Material published in *EHP* articles may not conform to [508 standards](#) due to the complexity of the information being presented. If you need assistance accessing journal content, please contact [ehp508@niehs.nih.gov](mailto:ehp508@niehs.nih.gov). Our staff will work with you to assess and meet your accessibility needs within 3 working days.

### **Supplemental Material**

#### **Human Health Benefits from Fish Consumption vs. Risks from Inhalation Exposures Associated with Contaminated Sediment Remediation: Dredging of the Hudson River**

Jacob Kvasnicka, Katerina S. Stylianou, Vy K. Nguyen, Lei Huang, Weihsueh A. Chiu, G. Allen Burton Jr, Jeremy Semrau, and Olivier Jolliet

#### **Table of Contents**

**Table S1.** Descriptions of primary model parameters for each considered health impact pathway.

**Table S2.** Input parameterization for estimating the health burden of fatal occupational incidents and associated uncertainty.

**Table S3.** Uncertainty analysis (Monte Carlo) input data for several time-independent parameters pertaining to oral PCB exposure from fish consumption, dose-response and severity.

**Table S4.** Uncertainty analysis (Monte Carlo) input data for time-dependent, lognormally distributed fish-tissue PCB concentrations ( $\overline{C(t)}_{\text{fish, PCB}}$ , mg<sub>PCB</sub>/kg<sub>fish</sub>).

**Table S5.** Uncorrected estimates of individual Hudson River fish and crab consumption.

**Table S6.** Population-level fish and crab consumption (kg/yr) from the Lower Hudson by survey, season, and species.

**Table S7.** Background data used to estimate population-level fish consumption from the Site.

**Table S8.** Background data used to correct estimates of population-level fish consumption from the Site.

**Table S9.** Background data used to estimate non-linear dose-response relationship for oral intake of PCBs.

**Table S10.** Summary of input parameterization for estimating above-baseline ambient air PCB exposures and risks during dredging.

**Table S11.** Summary of input parameterization for estimating emissions of primary PM<sub>2.5</sub> and NO<sub>x</sub> from project diesel-powered, nonroad heavy equipment.

**Table S12.** Summary of input parameterization for estimating emissions of primary PM<sub>2.5</sub> and NO<sub>x</sub> from barge traffic.

**Table S13.** Route characteristics, intake fractions (iF), and estimated air emissions from rail transport of PCB waste to and from seven hazardous waste landfills across the United States.

**Table S14.** Summary of project workers and cumulative exposure durations by general labor category.

**Figure S1.** Species- and river-section weighted annual average, wet-weight fish tissue concentrations of Tri+ PCBs, projected by US EPA's FISHRAND bioaccumulation model for different remedial alternatives. A) Upper Hudson and B) Lower Hudson forecasts. Model forecasts are from the EPA's Record of Decision (Table 11-2) (US EPA 2002) and Responsiveness Summary (Tables 313699-1 and 363176-1) (TAMS Consultants 2002). In the present study, MNA = Source Control (SC), and REM-3/10/Select (6-yr 0.13% resuspension) = Source Control with Environmental Dredging (SC&ED).

**Figure S2.** Slope of the PCB dose-response relationship corresponding to a 50% decrease in immunoglobulin M. Curved (black) solid line = median. Curved (black) dashed line = arithmetic mean. Surrounding (dark grey) area = 95% confidence interval. Vertical (colored) dashed lines = 95% confidence intervals of average daily doses (mg/kg-d) for three subpopulations: Upper Hudson anglers and their family members consuming fish at frequencies of 1) twice per year, 2) twice per month, and 3) twice per week during the 2004-2009 timeframe.

**Figure S3.** Ambient air total PCB concentrations measured along the dredging corridor during the remediation (2009-2015) by distance from the Site. Results were obtained from a site-specific ambient air PCB monitoring program (Anchor QEA and Environmental Standards 2009; Ecology and Environment 2004, 2017). Solid (black) horizontal lines represent the median, interquartile range (IQR), and 1.5×IQR. Dashed (green) horizontal line = mean background concentration.

**Figure S4.** Stochastic health benefit-risk comparison for the Hudson River PCBs Superfund Site Environmental Dredging (ED) remediation: Sensitivity analysis including worker impacts. Results were generated via Monte Carlo simulations accounting for parameter variability and uncertainty. A) Induced Health Burden ( $IB_{ED,sensitivity}$ ) = total health burden of ED from increased air emissions of PCBs, primary and secondary PM<sub>2.5</sub>, and fatal occupational incidents; B) Net Avoided Health Burden (Net health benefit<sub>ED</sub>) =  $AB_{ED} - IB_{ED,sensitivity}$ , with  $AB_{ED}$  being the Avoided Health Burden of ED as defined in the main text (Figure 4A). Dotted or dashed vertical lines correspond to the fifth, 10<sup>th</sup>, 25<sup>th</sup>, 50<sup>th</sup>, 75<sup>th</sup>, and 90<sup>th</sup> percentiles when read from left to right. The solid (red) vertical line through zero denotes a net of 0 avoided DALYs (i.e., benefits = risks). Values to the left of this line represent net risks while values to the right of this line represent net benefits.

## References
